# Supplementary material for: Derivation and characterization of matched cell lines from primary and recurrent serous ovarian cancer
Source: PubMed Central journal article supplement (PMC3532154; doi:10.1186/1471-2407-12-379), 2012-08-29

**TOV1369**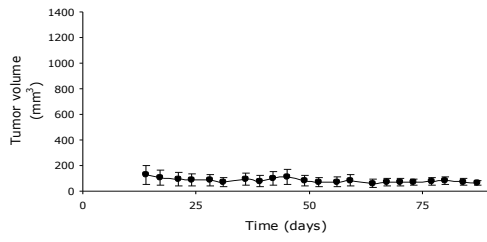**OV1369(R2)**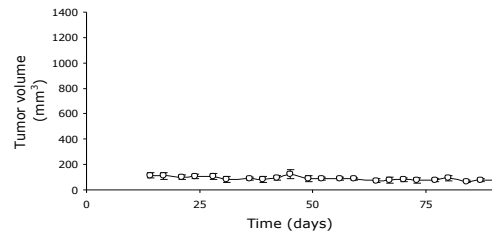**OV2295**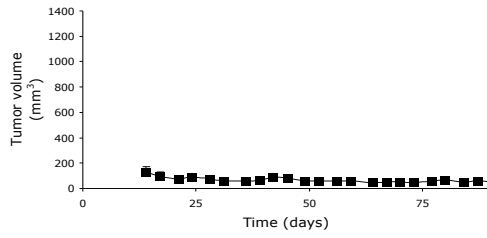**OV2295(R2)**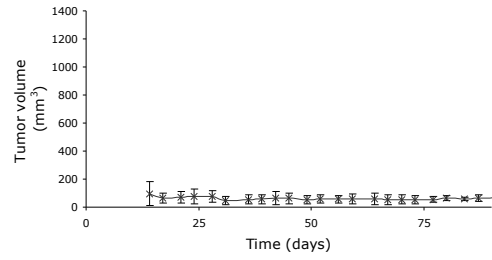**TOV2295(R)**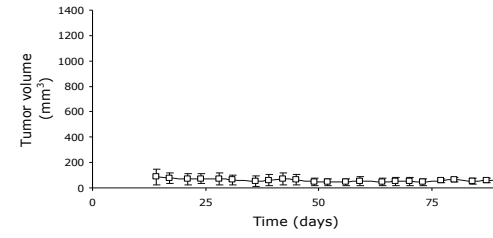**TOV3133G**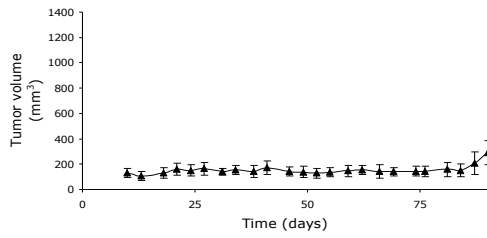**TOV3133D**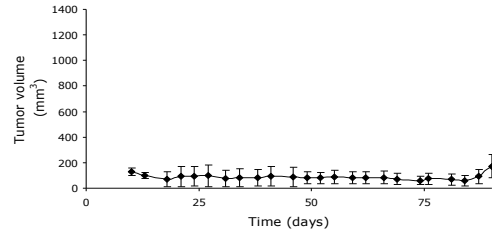**OV3133(R2)**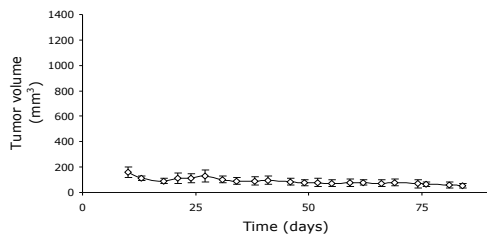**OV3133(R)**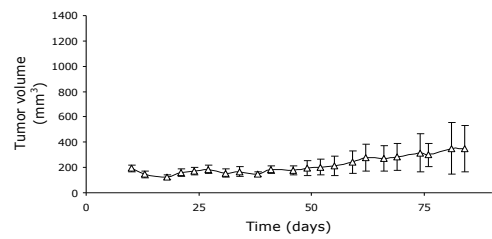**Controls**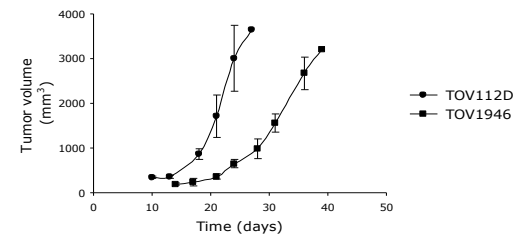

Supplement: 1471-2407-12-379-S3.pdf [file 1471-2407-12-379-S3.pdf]
