# Supplementary material for: Derivation and characterization of matched cell lines from primary and recurrent serous ovarian cancer
Source: PubMed Central journal article supplement (PMC3532154; doi:10.1186/1471-2407-12-379), 2012-08-29
Supplement: 1471-2407-12-379-S4.pdf [file 1471-2407-12-379-S4.pdf]

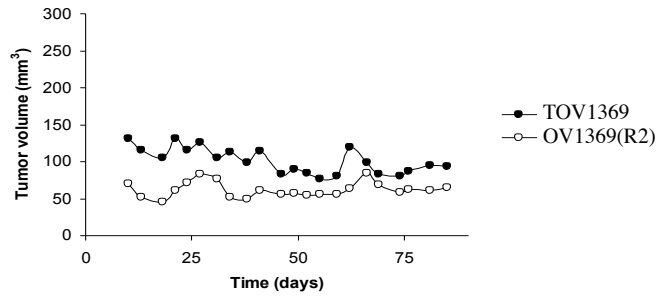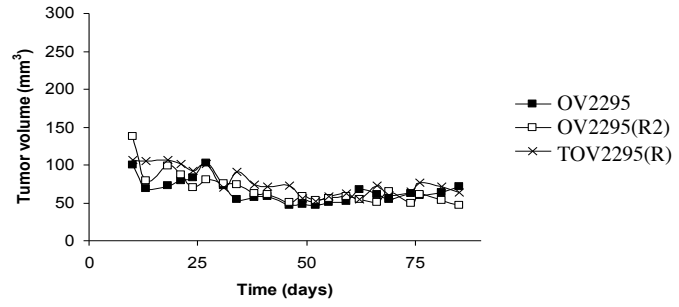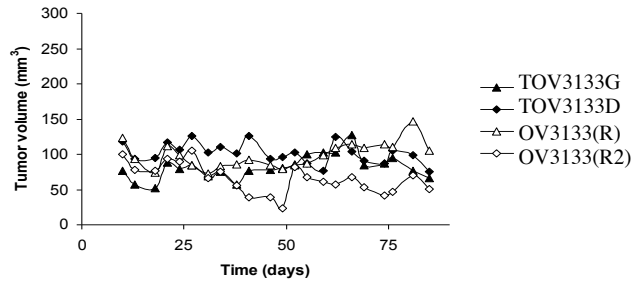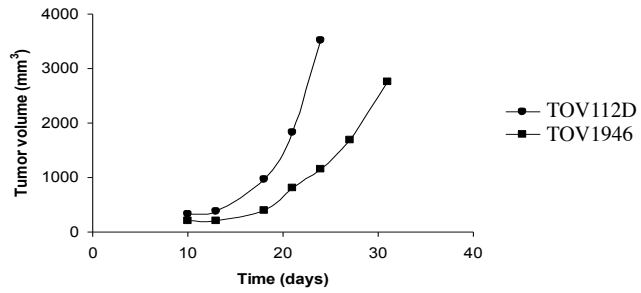

Additional File 4
